# Supplementary material for: Evaluating relationships between symptom duration and persistence of rheumatoid arthritis: does a window of opportunity exist? Results on the Leiden Early Arthritis Clinic and ESPOIR cohorts
Source: HighWire-hosted journal article supplement (doi:10.1136/annrheumdis-2014-206047), 2015-01-06

**Supplementary Figure 1.** Time-dependent receiver-operator-characteristic curves of symptom duration with DMARD-free sustained remission during 5-year follow-up as outcome for methotrexate users (A,C) and patients using other conventional DMARDs (B,D) in the EAC (A,B) and ESPOIR (C,D); the symptom duration with the best discriminative ability was determined using Youden's index.

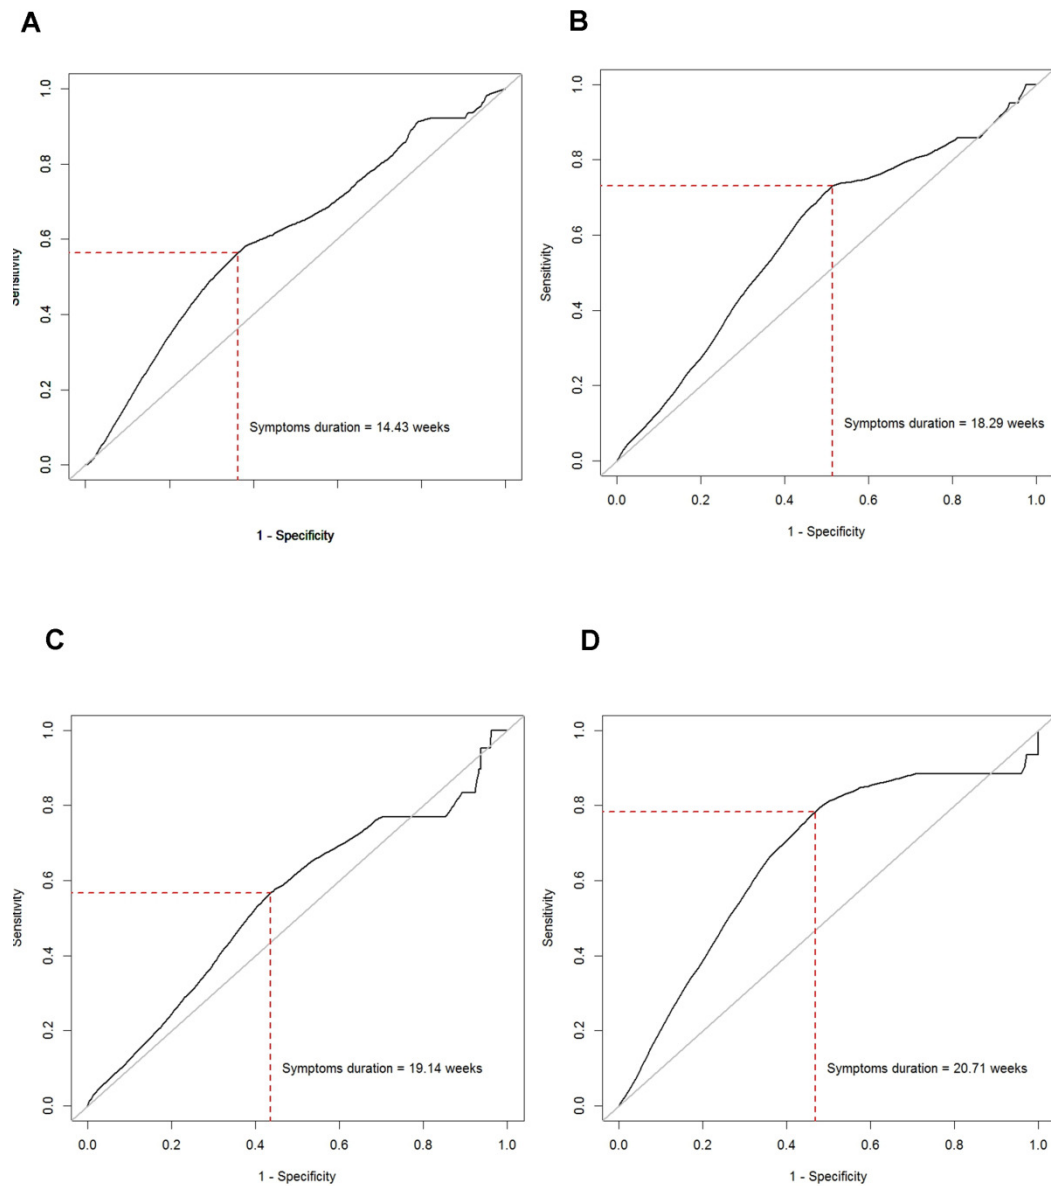

**Supplementary Figure 2.** Time-dependent receiver-operator-characteristic curves of symptom duration with DMARD-free sustained remission during 5-year follow-up as outcome for ACPA-positive (A) and ACPA-negative (B) RA-patients in the EAC.

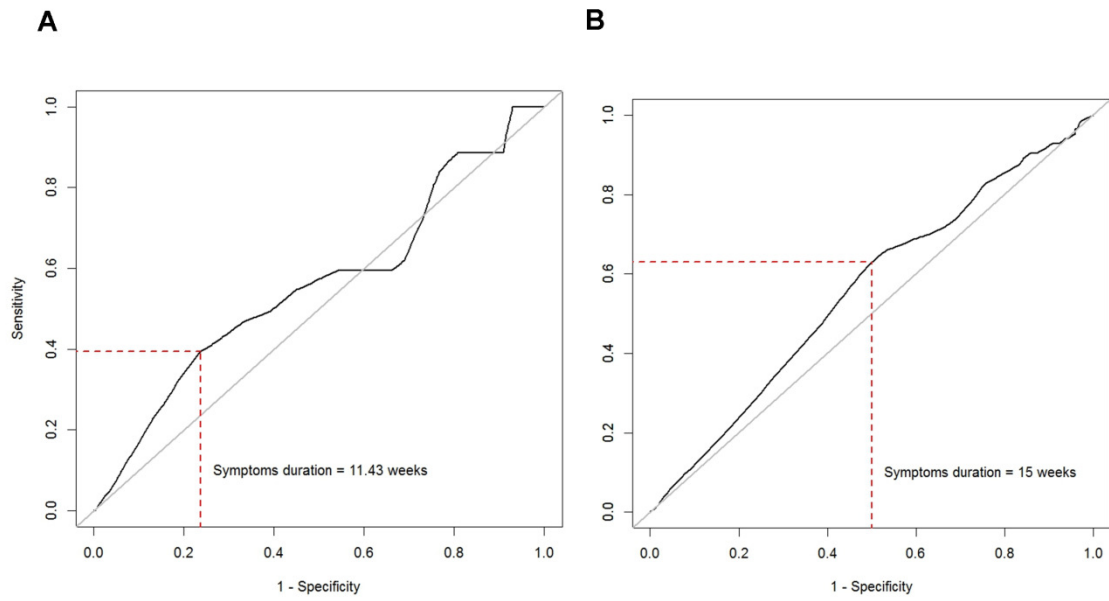

Supplement: annrheumdis-2014-206047supp.pdf [file annrheumdis-2014-206047supp.pdf]
